# Supplementary material for: Mechanism Governing Human Kappa-Opioid Receptor Expression under Desferrioxamine-Induced Hypoxic Mimic Condition in Neuronal NMB Cells
Source: MDPI journal article supplement (doi:10.3390/ijms18010211), 2017-01-20
Supplement: s1 [file s1]

## Supplementary Materials: Mechanism Governing Human Kappa-Opioid Receptor Expression under Desferrioxamine-Induced Hypoxic Mimic Condition in Neuronal NMB Cells

Jennifer Babcock, Alberto Herrera, George Coricor, Christopher Karch, Alexander H. Liu, Aida Rivera-Gines and Jane L. Ko

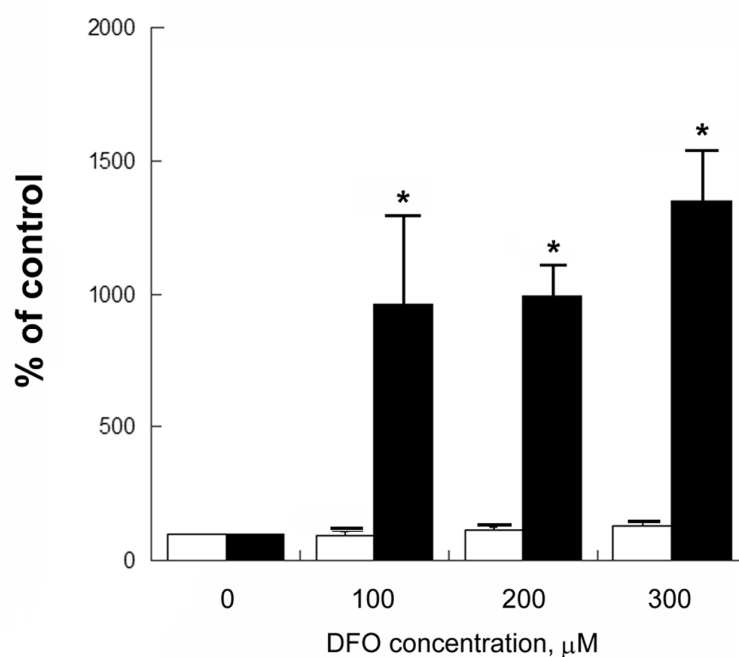

**Figure S1.** Effects of various DFO concentrations on *hKOR* gene expression using the luciferase reporter assay. NMB cells were transfected with the CD11 plasmid (black bars) and the pGL3-promoter vector (white bars), respectively. The pCH110 plasmid with the  $\beta$ -galactosidase was co-transfected and used as an internal standard. Transfected cells were treated without (0) or with DFO (100, 200 or 300  $\mu\text{M}$ ) for 24 h. Cells were harvested and subjected to luciferase assay. The promoter activity was expressed as a percentage of non-DFO treated control (0) activity, arbitrarily defined as 100%. Histograms represent mean values of activation. Error bars indicate S.E.M. Experiments were repeated six times. “\*” indicates  $p < 0.01$  (student *t*-test).

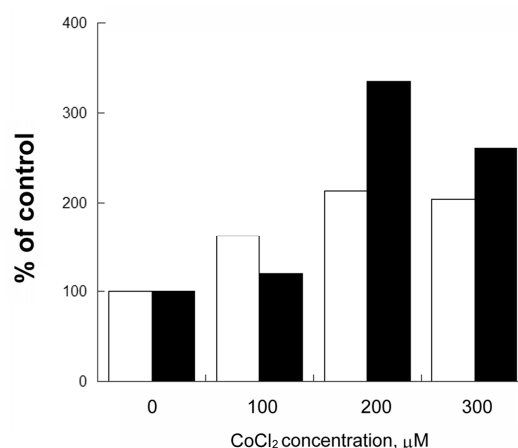

**Figure S2.** Effects of various CoCl<sub>2</sub> concentrations on *hKOR* gene expression using the luciferase reporter assay. NMB cells were transfected with the CD11 plasmid. The pCH110 plasmid with the  $\beta$ -galactosidase was co-transfected and used as an internal standard. Transfected cells were treated without (0) or with CoCl<sub>2</sub> (100, 200 or 300  $\mu$ M) for 24 h. Cells were harvested and subjected to luciferase assay. The promoter activity was expressed as a percentage of non-treated control (0) activity, arbitrarily defined as 100%. Histograms represent the value of activation from individual samples (total of two samples: black bars and white bars).

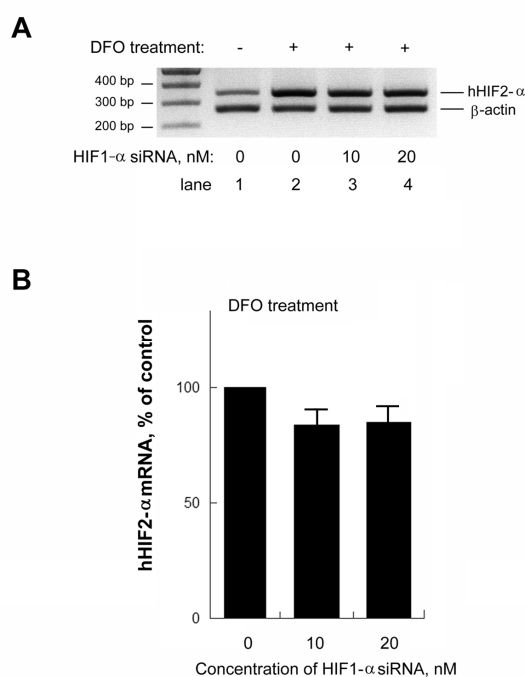

**Figure S3.** Examine the effect of hHIF-1 $\alpha$  siRNA on the levels of hHIF-2 $\alpha$  mRNAs. (A) NMB cells were transfected with hHIF-1 $\alpha$  siRNA (lane 3, 10 nM; lane 4, 20 nM) or without hHIF-1 $\alpha$  siRNA (indicated as 0 nM; lanes 1 and 2). Twenty-four hours after transfection, cells were treated without (lane 4, -) or with DFO for 24 h (lanes 1–3, +). RNAs were extracted from transfected cells. Semi-quantitative RT-PCR was carried out using a pair of human hHIF-2 $\alpha$  primers. The  $\beta$ -actin primers were also included in every PCR reaction for normalization use. PCR products were separated by gel electrophoresis. DNA markers are labeled on the left; (B) quantitation of human hHIF-2 $\alpha$  mRNA levels is shown, with the normalized hHIF-2 $\alpha$  mRNA level from the DFO treated sample without siRNA as 100%. The hHIF-1 $\alpha$  siRNA did not affect the amount of endogenous hHIF-2 $\alpha$  mRNA. Histograms represent mean  $\pm$  S.E.M. Experiments were repeated five times.
